# Supplementary figures and images for: Avian H6 Influenza Viruses in Vietnamese Live Bird Markets during 2018–2021
Source: MDPI journal article supplement (doi:10.3390/v16030367), 2024-02-27

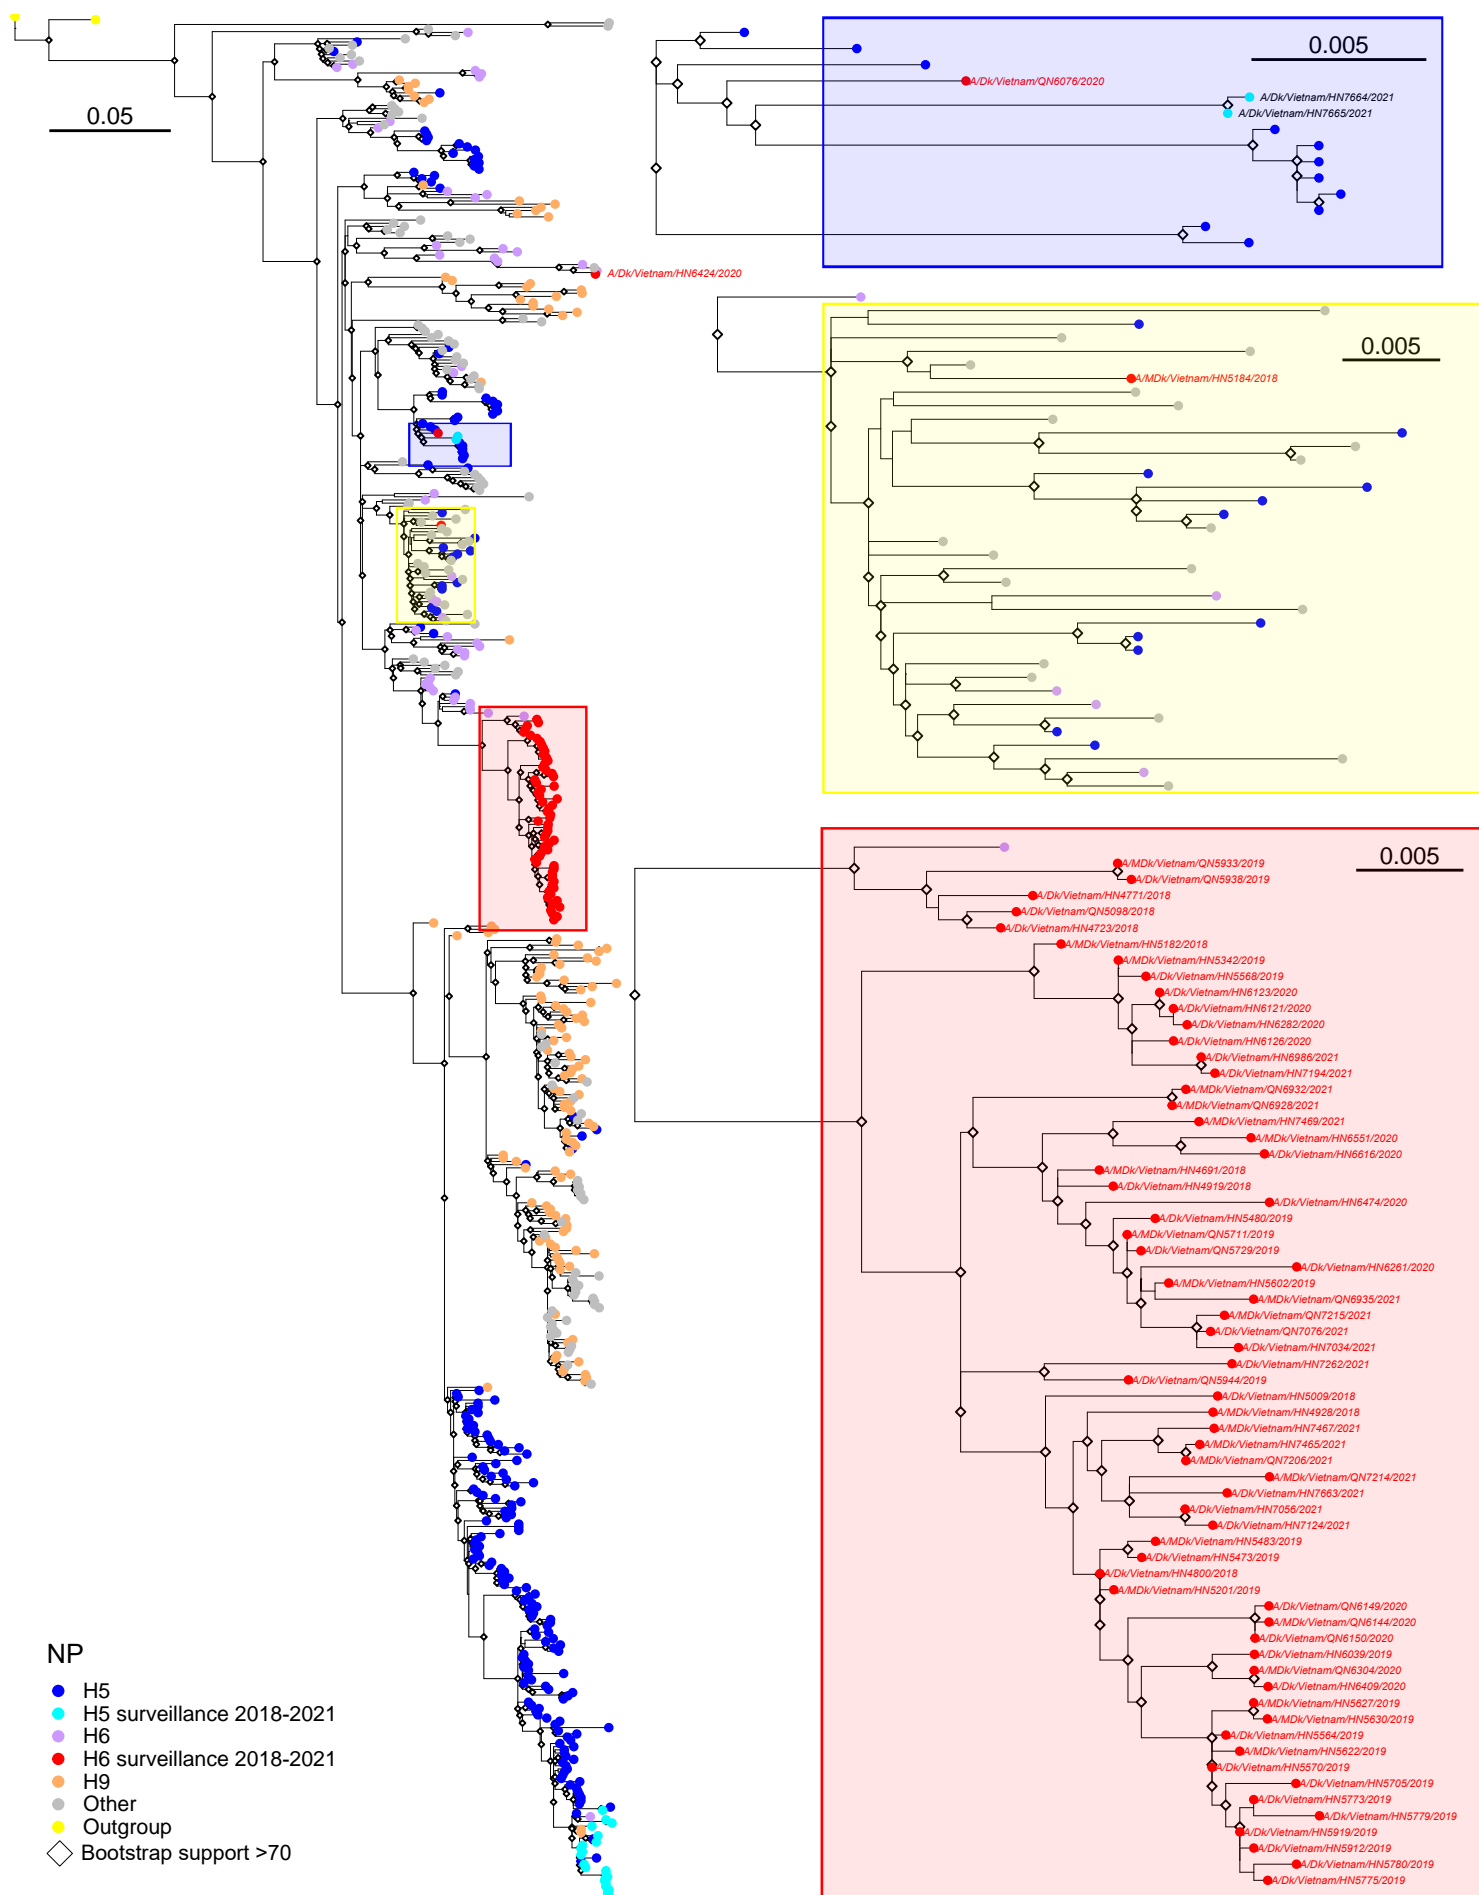

Supplement: s1 [file s1]

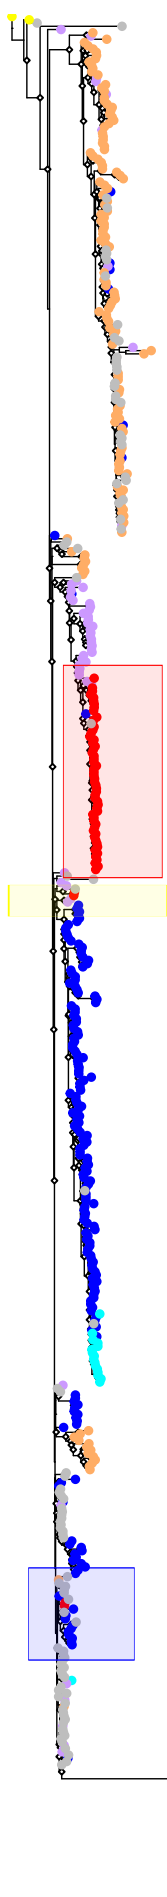

0.1

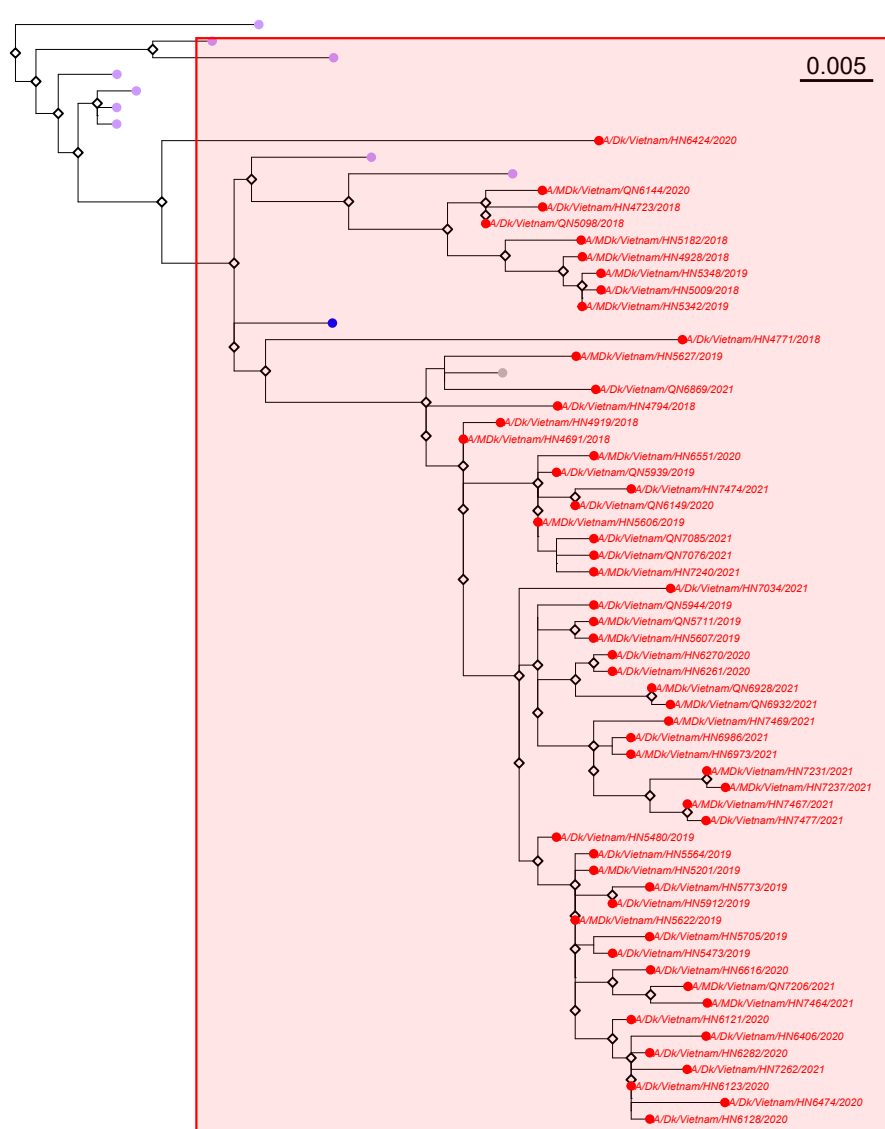

0.005

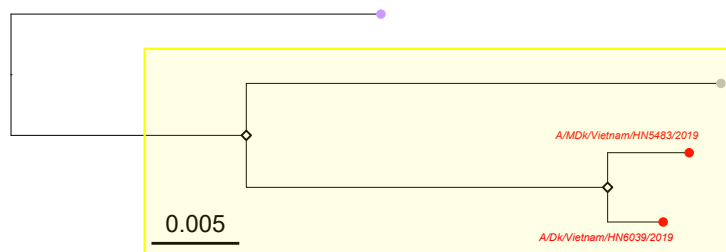

0.005

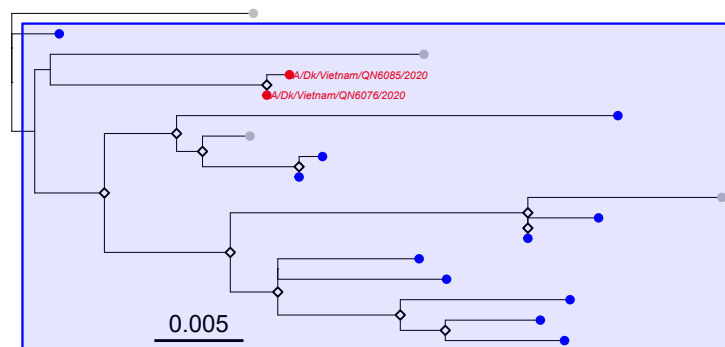

0.005

NS

- H5
- H5 surveillance 2018-2021
- H6
- H6 surveillance 2018-2021
- H9
- Other
- Outgroup
- ◇ Bootstrap support >70

A/MDK/Vietnam/  
HN5184/2018

Supplement: s1 [file s1]

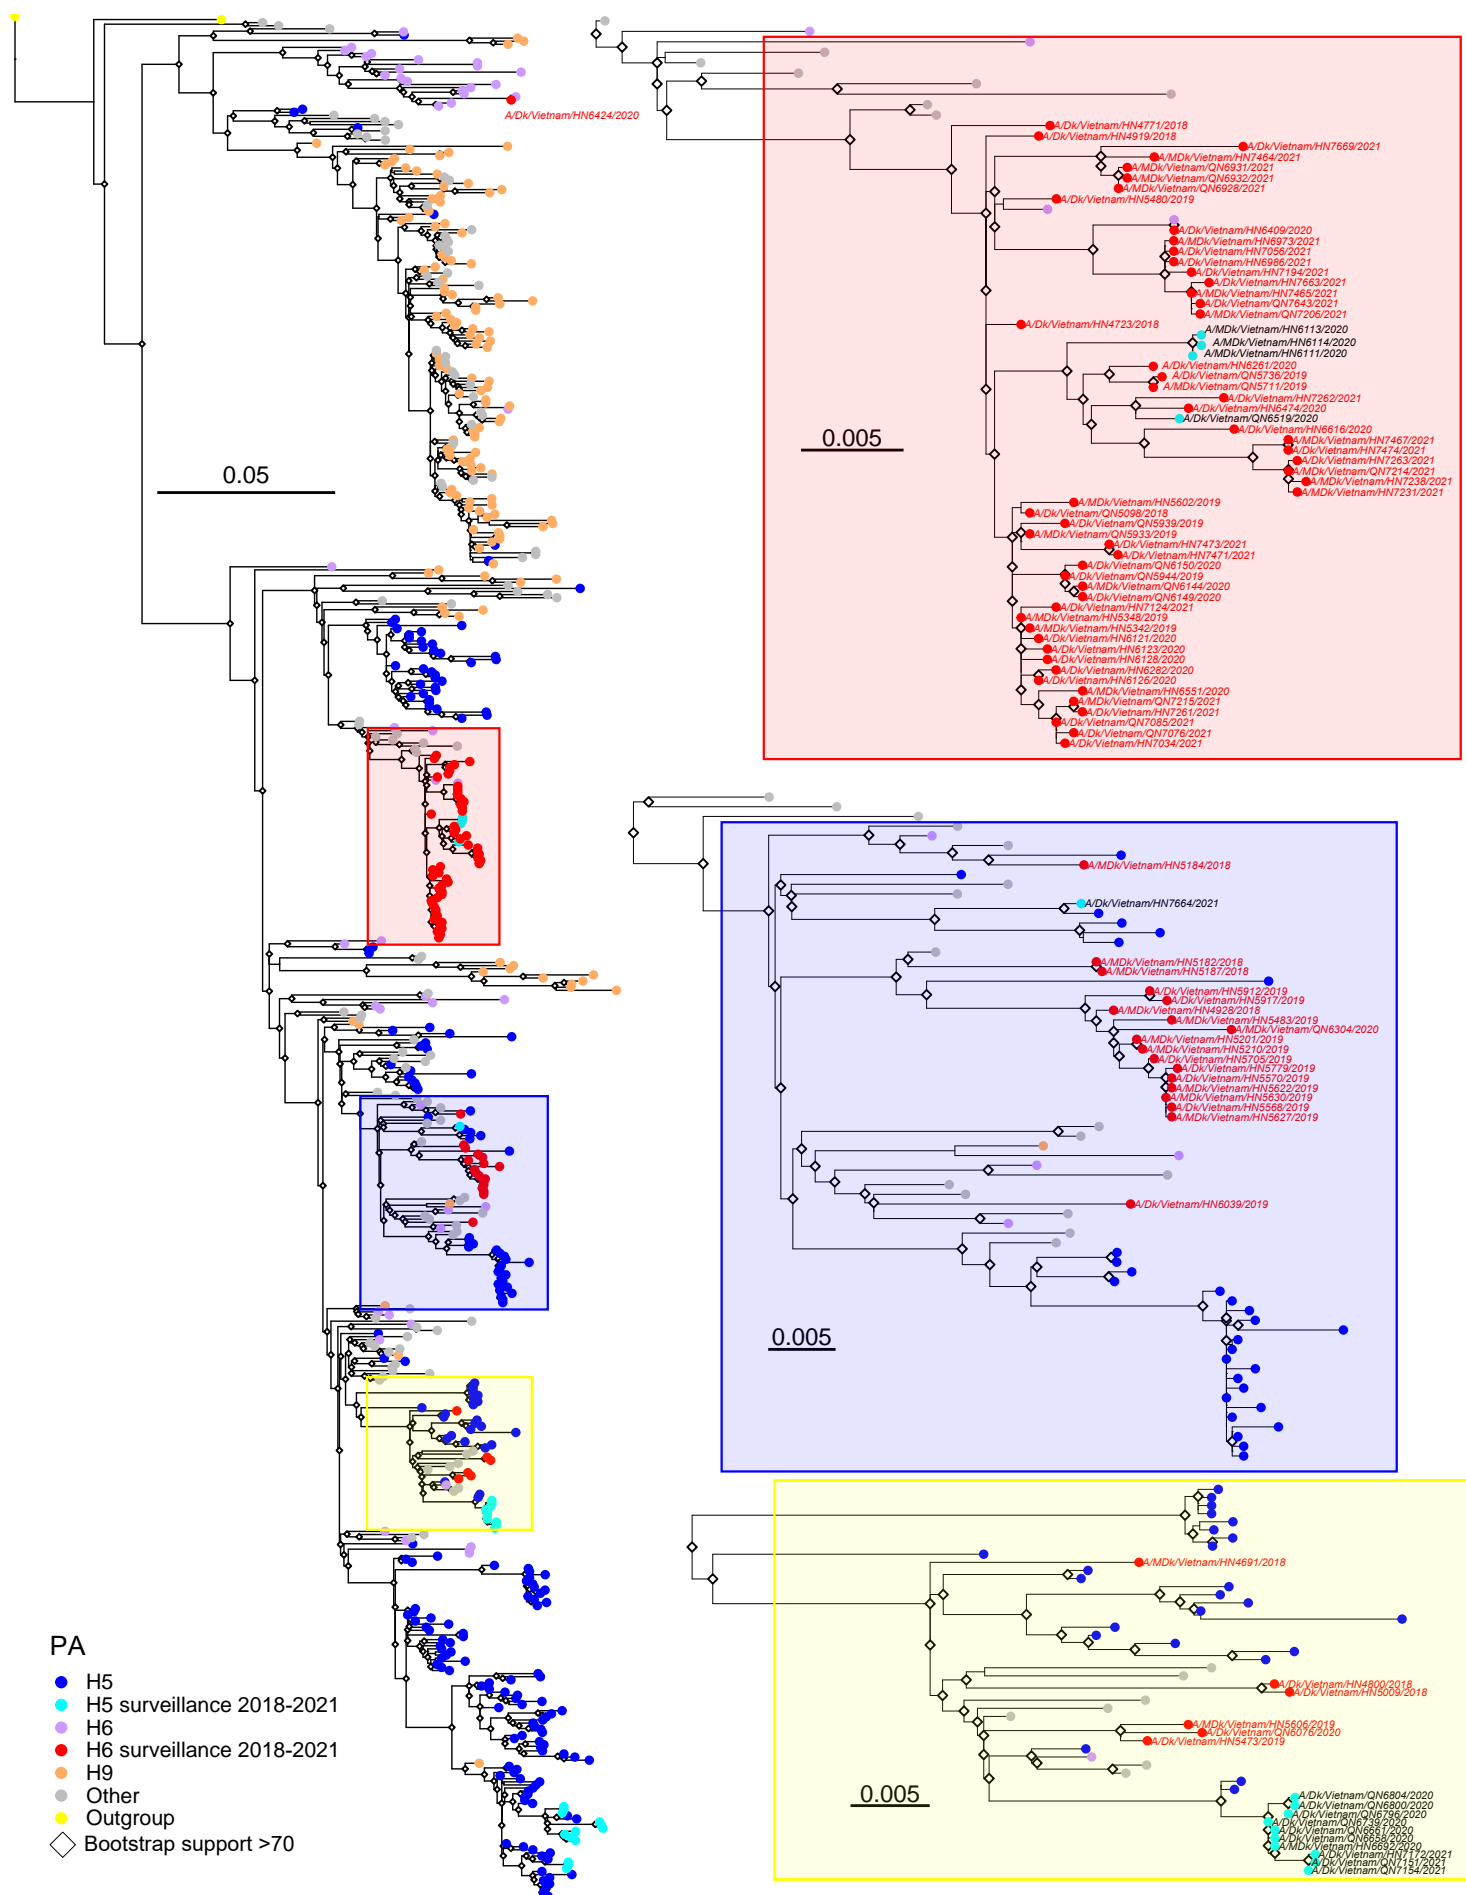

Supplement: s1 [file s1]

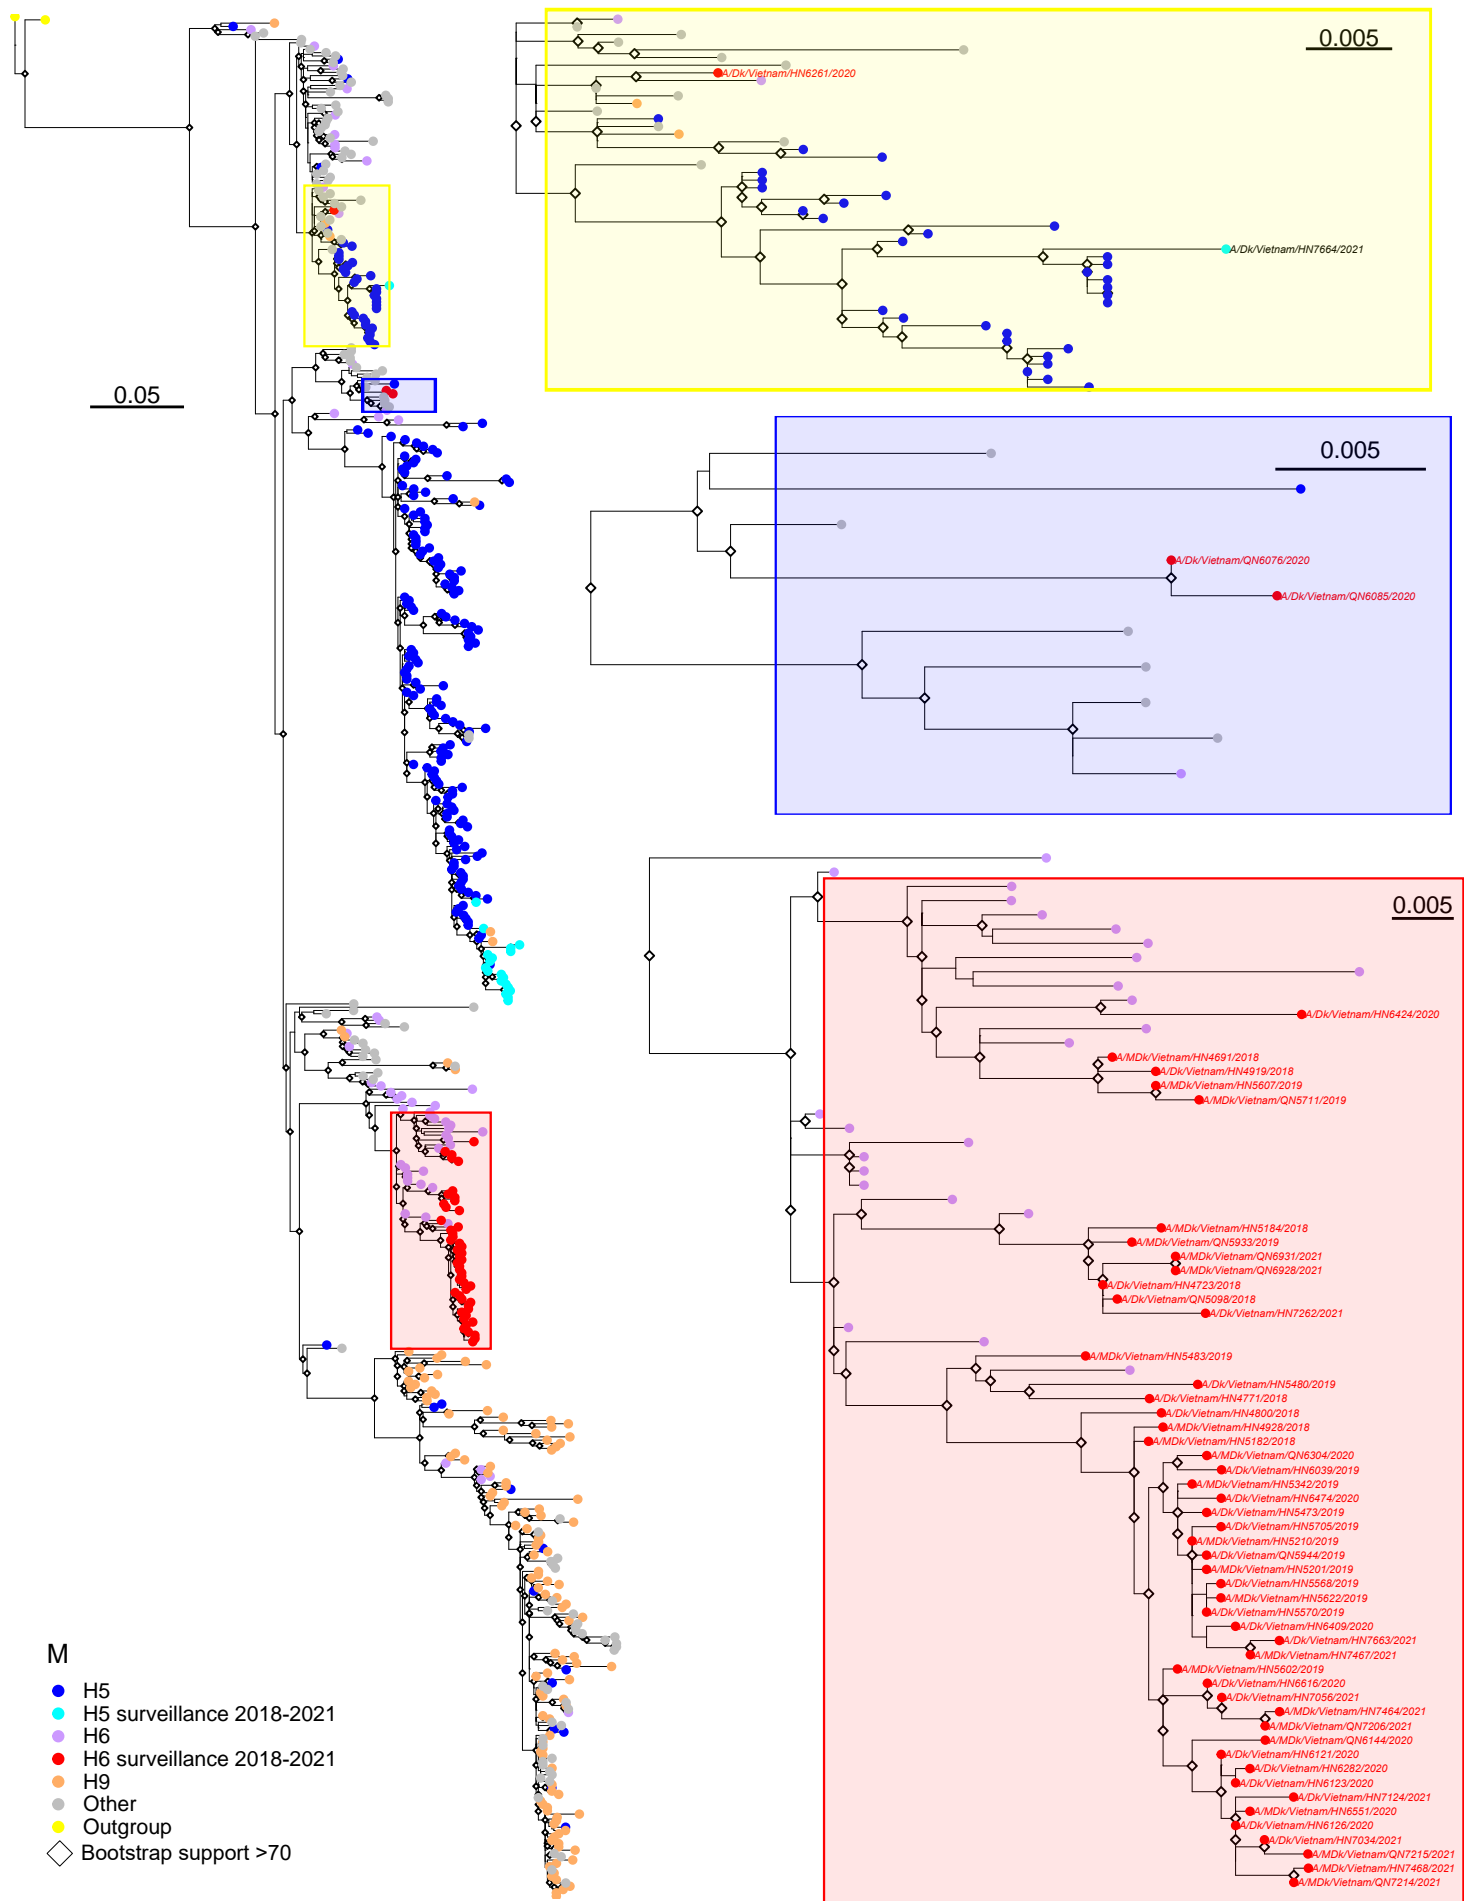

Supplement: s1 [file s1]

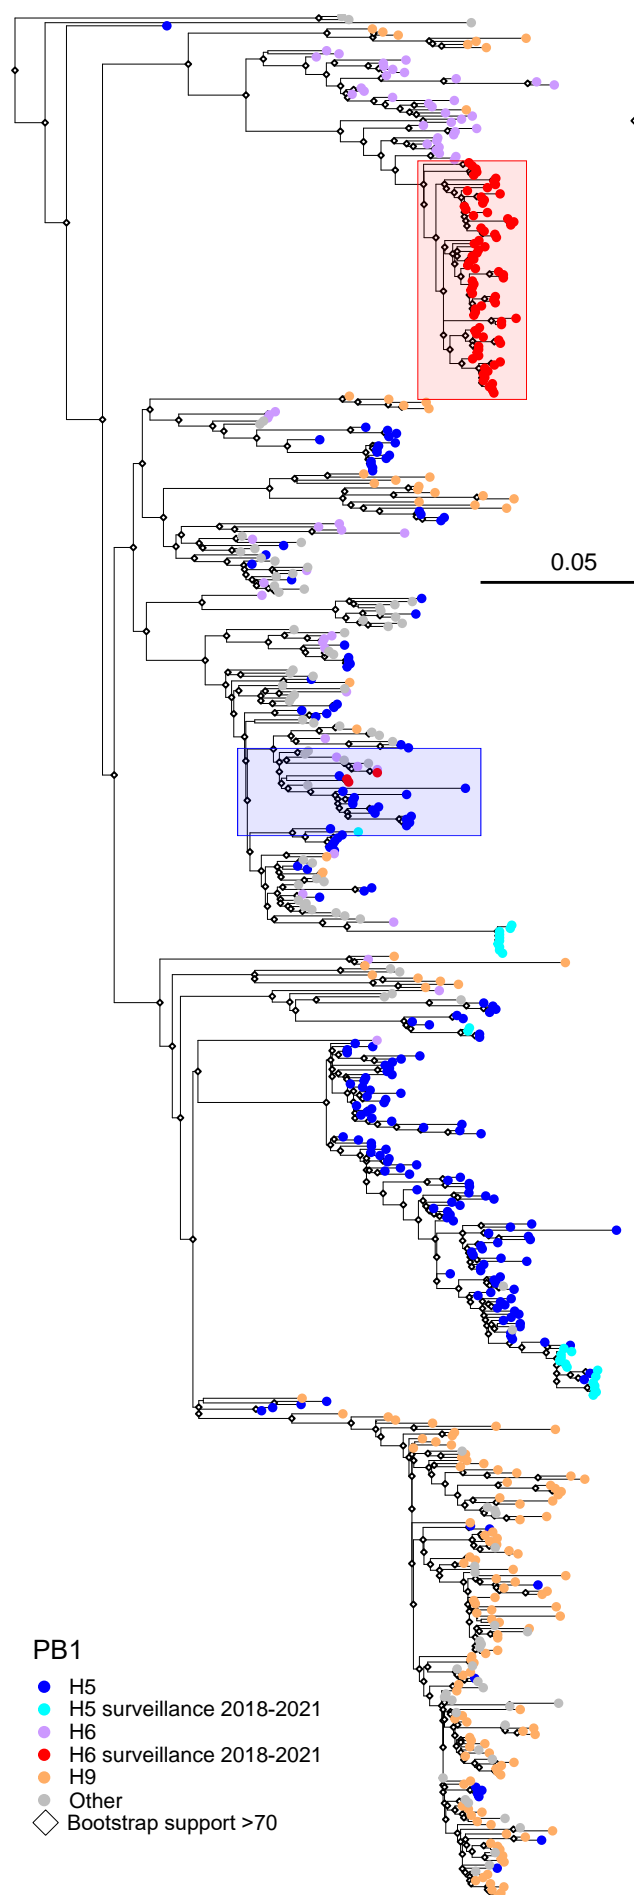

PB1

- H5
- H5 surveillance 2018-2021
- H6
- H6 surveillance 2018-2021
- H9
- Other
- ◇ Bootstrap support >70

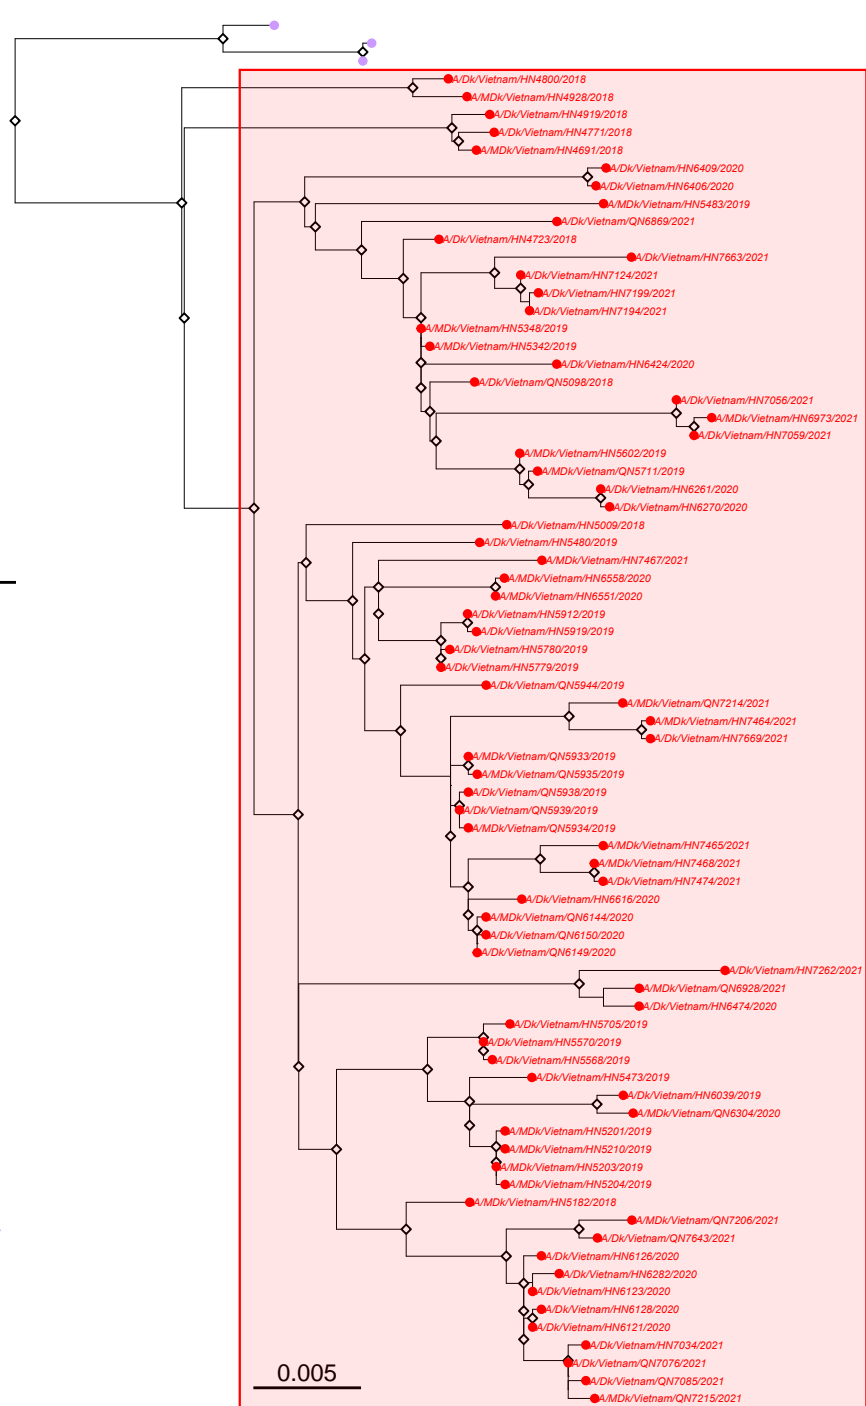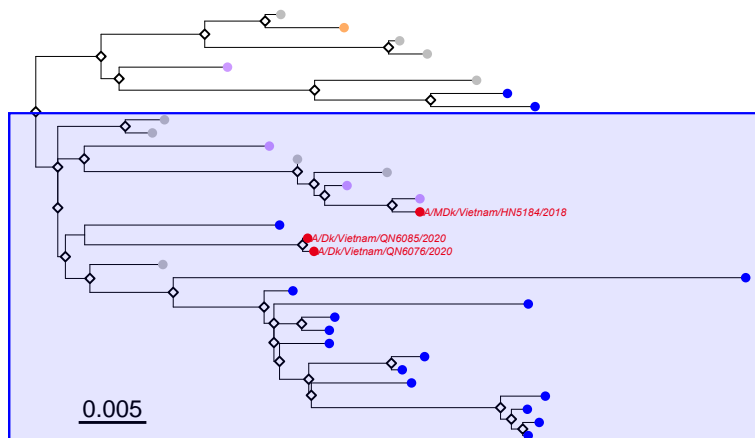

Supplement: s1 [file s1]
